# Supplementary material for: Prevalence of surgical site infection and its associated factors after cesarean section in Ethiopia: systematic review and meta-analysis
Source: BMC Pregnancy Childbirth. 2020 May 20;20:311. doi: 10.1186/s12884-020-03005-8 (PMC7238644; doi:10.1186/s12884-020-03005-8)
Supplement: Supplementary file 2 — Additional file 2. Risk of Bias assessment Tool of Eligible Articles by using the Hoy 2012 tool. [file 12884_2020_3005_MOESM2_ESM.xlsx]

## Sheet: Sheet1
	Table S1: Risk of Bias assessment Tool of Eligible Articles by using the Hoy 2012 tool
NO	Study ID	Representation	Sampling	Random selection	Non response bias	Data collection	Case Definition	Reliability and validity of study tool	Method of data collection	Prevalence period	Numerator and denominator	Summary Assessment
1	Mamo et al	Low risk	Low risk	Low risk	Low risk	Low risk	High risk	Low risk	Low risk	Low risk	Low risk	Low risk
2	Gelaw et al	High risk	Low risk	Low risk	Low risk	Low risk	Low risk	Low risk	Low risk	Low risk	Low risk	Low risk
3	Aklilu et al	High risk	Low risk	High risk	Low risk	Low risk	High risk	High risk	High risk	low risk	Low risk	High risk
4	Amenu et al	High risk	Low risk	High risk	Low risk	Low risk	High risk	High risk	High risk	low risk	Low risk	High risk
5	Wedajo et al	Low risk	Low risk	Low risk	Low risk	Low risk	Low risk	Low risk	Low risk	Low risk	Low risk	Low risk
6	Azeze et al	Low risk	Low risk	Low risk	Low risk	Low risk	Low risk	Low risk	Low risk	Low risk	Low risk	Low risk
7	Gelaw et al	Low risk	Low risk	Low risk	Low risk	Low risk	Low risk	Low risk	Low risk	Low risk	Low risk	Low risk
8	Mulu et al	Low risk	Low risk	High risk	Low risk	High risk	High risk	High risk	Low risk	Low risk	Low risk	High risk
9	Gedefaw et al	Low risk	Low risk	Low risk	Low risk	Low risk	Low risk	Low risk	Low risk	Low risk	Low risk	Low risk
10	Rose et al	Low risk	Low risk	Low risk	Low risk	Low risk	Low risk	Low risk	Low risk	Low risk	Low risk	Low risk
11	Wondemagegn et al	Low risk	Low risk	High risk	Low risk	High risk	High risk	High risk	Low risk	Low risk	Low risk	High risk
22	Risk of bias assessment tool: Yes (low risk); No (high risk)
23	1. Representation: Was the study population a close representation of the national population?
24	2. Sampling: Was the sampling frame a true or close representation of the target population?
25	3. Random selection: Was some form of random selection used to select the sample OR was a census undertaken?
26	4. Non-response bias: Was the likelihood of non-response bias minimal?
27	5. Data collection: Were data collected directly from the subjects?
28	6. Case definition: Was an acceptable case definition used in the study?
29	7. Reliability and validity of study tool: Was the study instrument that measured the parameter of interest show to have reliability and validity?
30	8. Data collection: Was the same mode of data collection used for all subjects?
31	9. Prevalence period: Was the length of the prevalence period for the parameter of interest appropriate?
	10. Numerators and denominators: Were the numerator(s) and denominator(s) for the parameter of interest appropriate?
	The overall risk of bias scored based on the number of high risk of bias per study: low risk (≤2), moderate risk (3–4), and high risk (≥5).

## Sheet: Sheet2
Cherinet et al.
Cherinet et al.
Berhanu et al.
Girma et al.
Mezgebu et al.
Wolka E et al.
Gebriel et al.
Mesele et al.
Aweke KA et al.
Kibatu et al.
Enyew et al.
Hailu et al.
Sime HK et al.
Solomon E .
Muleta et al.
Hibstu DT et al.
Tigabu E et al.
Ahmed A et al.
Abebe et al.
